# Supplementary material for: Heterologous Expression of MfWRKY7 of Resurrection Plant Myrothamnus flabellifolia Enhances Salt and Drought Tolerance in Arabidopsis
Source: MDPI journal article supplement (doi:10.3390/ijms23147890), 2022-07-17
Supplement: s1 [file s1]

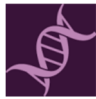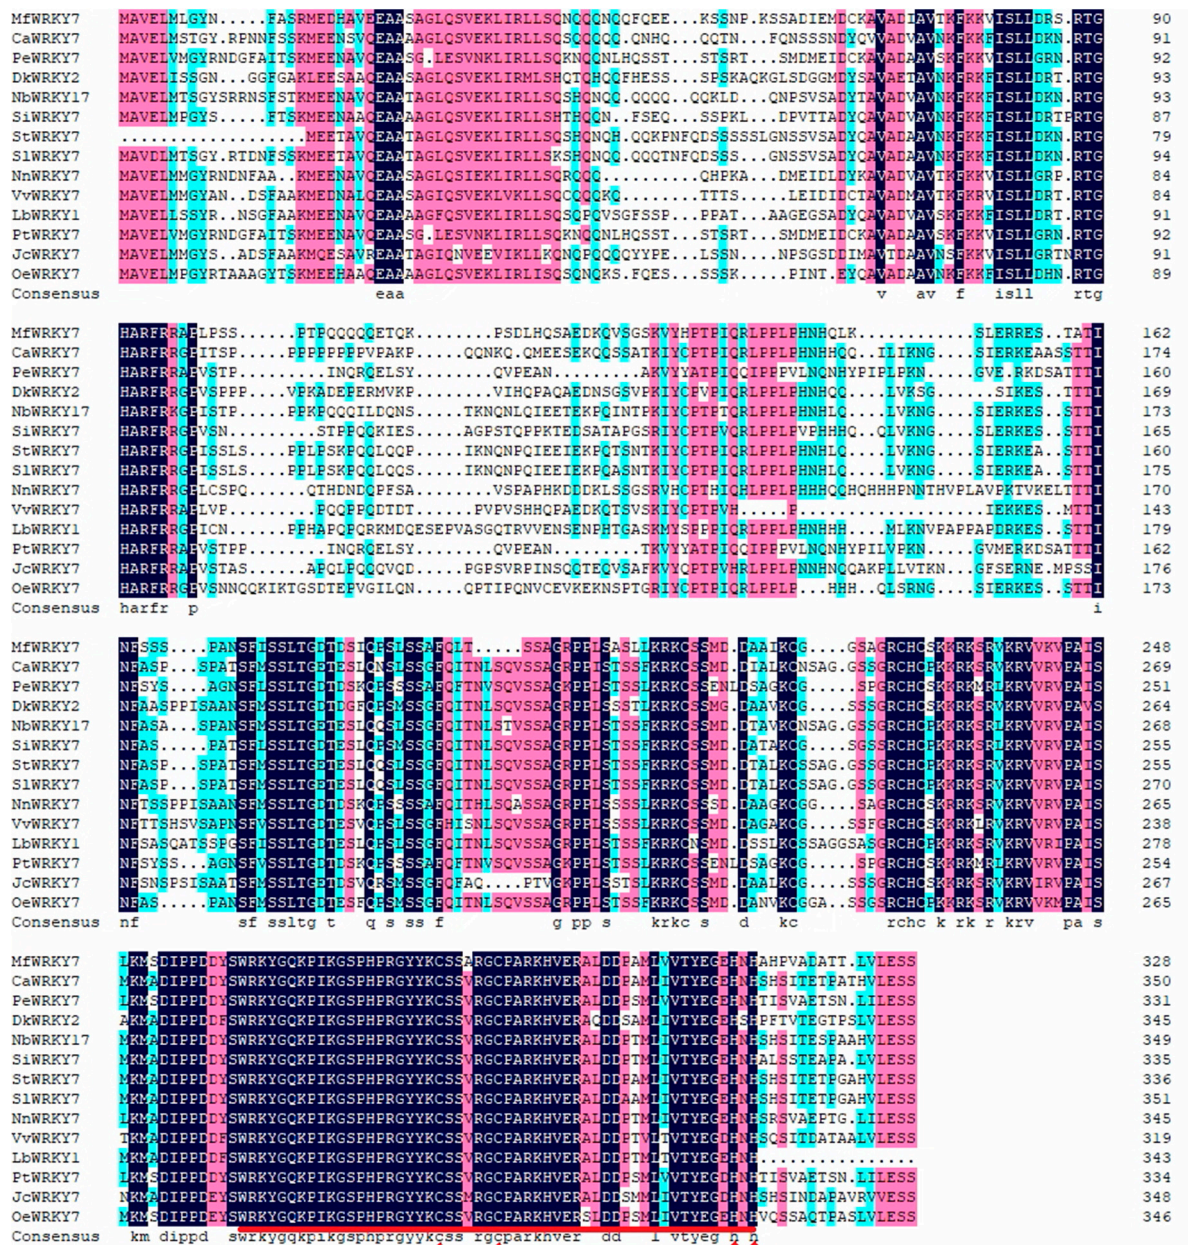

**Figure S1** Multiple alignment of deduced amino acid sequences of *MfWRKY7* the some highly homologous WRKYs from different plant species. Identical and similar amino acids are shaded in same color; Red line represented WRKY domain, red triangles represented zinc finger structure, and the altered amino acid residue is indicated by an arrow.

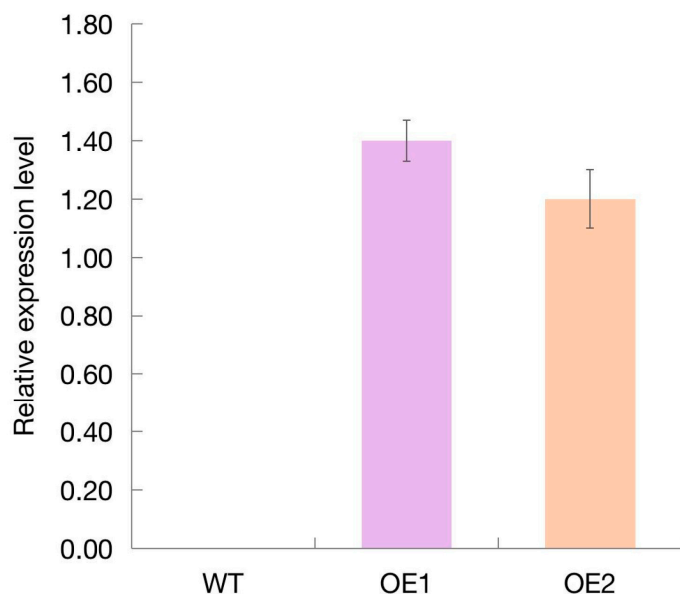

**Figure S2** Quantification of expression level of *MfWRKY7* by quantitative real-time PCR (qRT-PCR). Leaves from transgenic and WT plants growing to 4-week-old were sampled. Total RNA was extracted with Plant RNA Kit (Omega Bio-tek, Norcross, GA, United States), which was also purified with RNase-Free DNase I (Omega Bio-tek) and reverse transcribed into cDNA by use of Uscrip II (Innovagene biotech, Hunan, China). The qRT-PCR amplification was performed in 25  $\mu$ l reaction mixture (innovagene biotech) including 12.5  $\mu$ l 2 $\times$ Taq SYBR Green qPCR Mix, 0.5  $\mu$ l of 10  $\mu$ M of each primer, 4  $\mu$ l 5-fold-diluted cDNA, and 7.5  $\mu$ l of Nuclease-free H<sub>2</sub>O, which was performed using the real-time PCR instrument CFX Connect (Bio-Rad, Hercules, CA, USA). Amplification conditions were devised that 94°C for 3 min, 42 cycles of degeneration at 94°C for 8 s, annealing/extension at 60°C for 60 s. The relative expression quantity of the target gene was evaluated based on the method of  $2^{-\Delta\Delta CT}$  [1]. And the results were normalized by an internal reference gene *Actin2* for quantitative analysis of relative genes. Each RT-qPCR experiment was reproduced at least three times. The gene-specific amplification primers were: *Actin2F*: 5'-GGAAGGATCTGTACGGTAAC-3' and *Actin2R*: 5'-TGTGAACGATTCCTGGACCT-3' for *Actin2*, and *MfWRKY7F*: 5'-GGGCGCCTTTACCTTCTTCT-3' and *MfWRKY7R*: 5'-AGCGTTGAATTGGCGTAGGA-3' for *MfWRKY7*, respectively.

- [1] Livak, K.J.; Schmittgen, T.D.. Analysis of relative gene expression data using real-time quantitative PCR and the  $2^{-(\Delta\Delta C(T))}$  Method. *Methods San Diego Calif* **2001**, *25*, 402–408, doi:10.1006/meth.2001.1262.

Table S1 The GenBank accession numbers of the sequences used in Fig. 1b and Fig. S1.

| Genes Name | Accession numbers       |
|------------|-------------------------|
| SIWRKY7    | XP_004238130.1_probable |
| StWRKY2    | NP_001275001.1          |
| CaWRKY7    | XP_016568783.1          |
| NbWRKY17   | AIR74899.1              |
| SiWRKY7    | XP_011074403.1          |
| OeWRKY7    | XP_022868232.1          |
| LbWRKY1    | ACT55331.1              |
| DkWRKY2    | AVL95372.1              |
| NnWRKY7    | XP_010263444.1          |
| PeWRKY7    | XP_011005809.1          |
| PtWRKY7    | XP_006380693.1          |
| VvWRKY7    | XP_002284966.1          |
| JcWRKY7    | XP_020533746.1          |
